# Supplementary material for: Dithiafulvene derivatized donor–acceptor norbornadienes with redshifted absorption
Source: Royal Society of Chemistry journal article supplement (doi:10.1039/c8cp07744d), 2019-01-01
Supplement: c8cp07744d1.pdf [file c8cp07744d1.pdf]

# Electronic supporting information

## Dithiafulvene derivatized donor-acceptor norbornadienes with redshifted absorption

Mads Mansø,<sup>a,b</sup> Martin Drøhse Kilde,<sup>a</sup> Sandeep Kumar Singh,<sup>b</sup> Paul Erhart,<sup>b</sup> Kasper Moth-Poulsen<sup>b</sup>  
and Mogens Brøndsted Nielsen<sup>a,\*</sup>

<sup>a</sup> *Department of Chemistry, University of Copenhagen, Universitetsparken 5, DK-2100 Copenhagen  
Ø, Denmark. E-mail: mbn@chem.ku.dk*

<sup>b</sup> *Department of Chemistry and Chemical Engineering, Chalmers University of Technology,  
Kemivägen 10, 412 96 Gothenburg, Sweden*

### Contents

|                                            |            |
|--------------------------------------------|------------|
| <b>NMR spectra</b>                         | <b>S2</b>  |
| <b>UV-absorption and switching studies</b> | <b>S16</b> |
| <b><sup>1</sup>H NMR switching studies</b> | <b>S17</b> |
| <b>Calculations</b>                        | <b>S19</b> |

# NMR spectra

## Compound 5

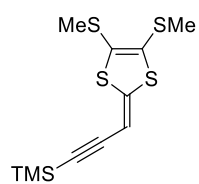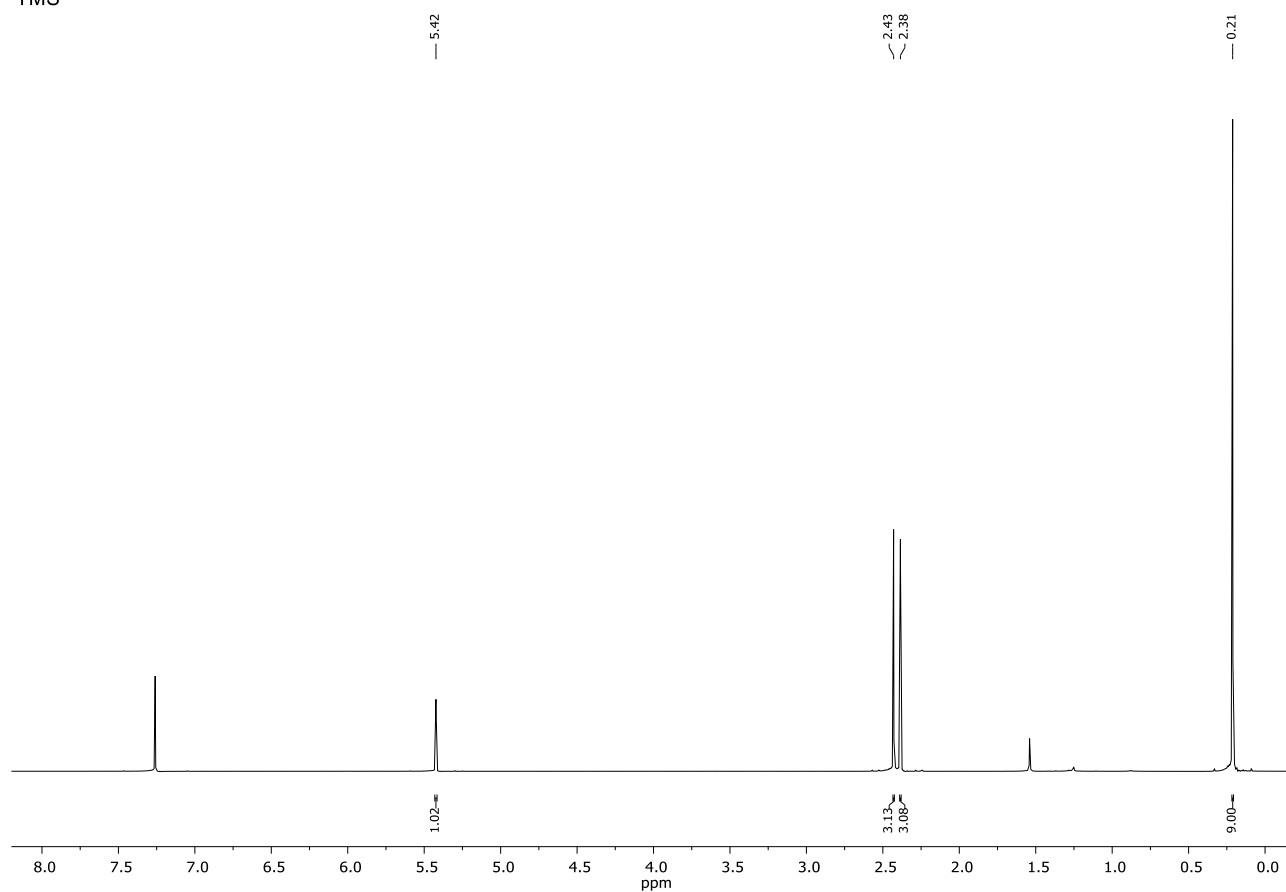

Figure S1: <sup>1</sup>H NMR (500 MHz) of 5 in CDCl<sub>3</sub>.

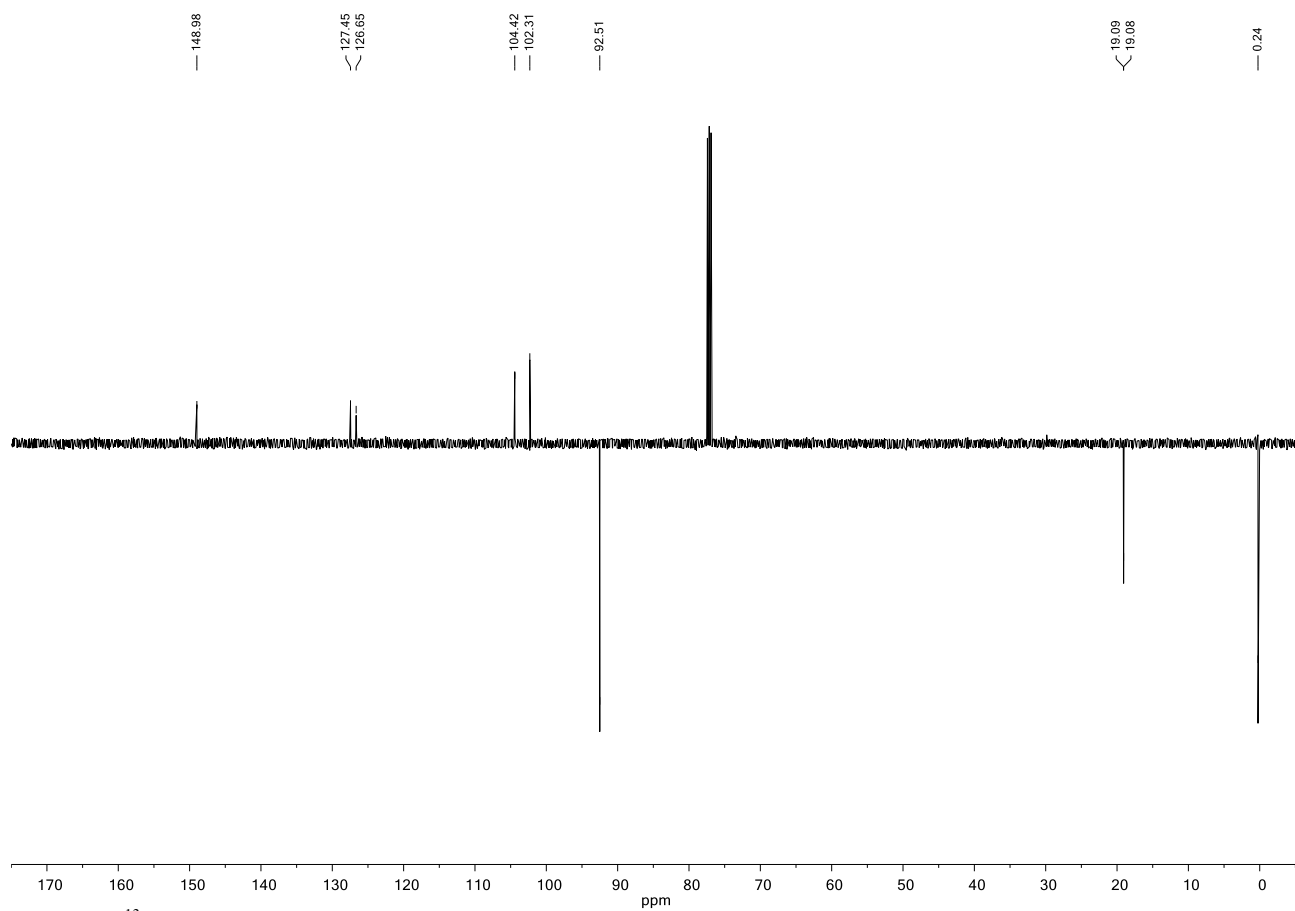

**Figure S2:**  $^{13}\text{C}$  APT NMR (126 MHz) of **5** in  $\text{CDCl}_3$ .

# Compound 6

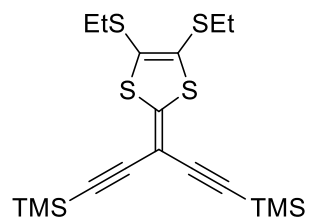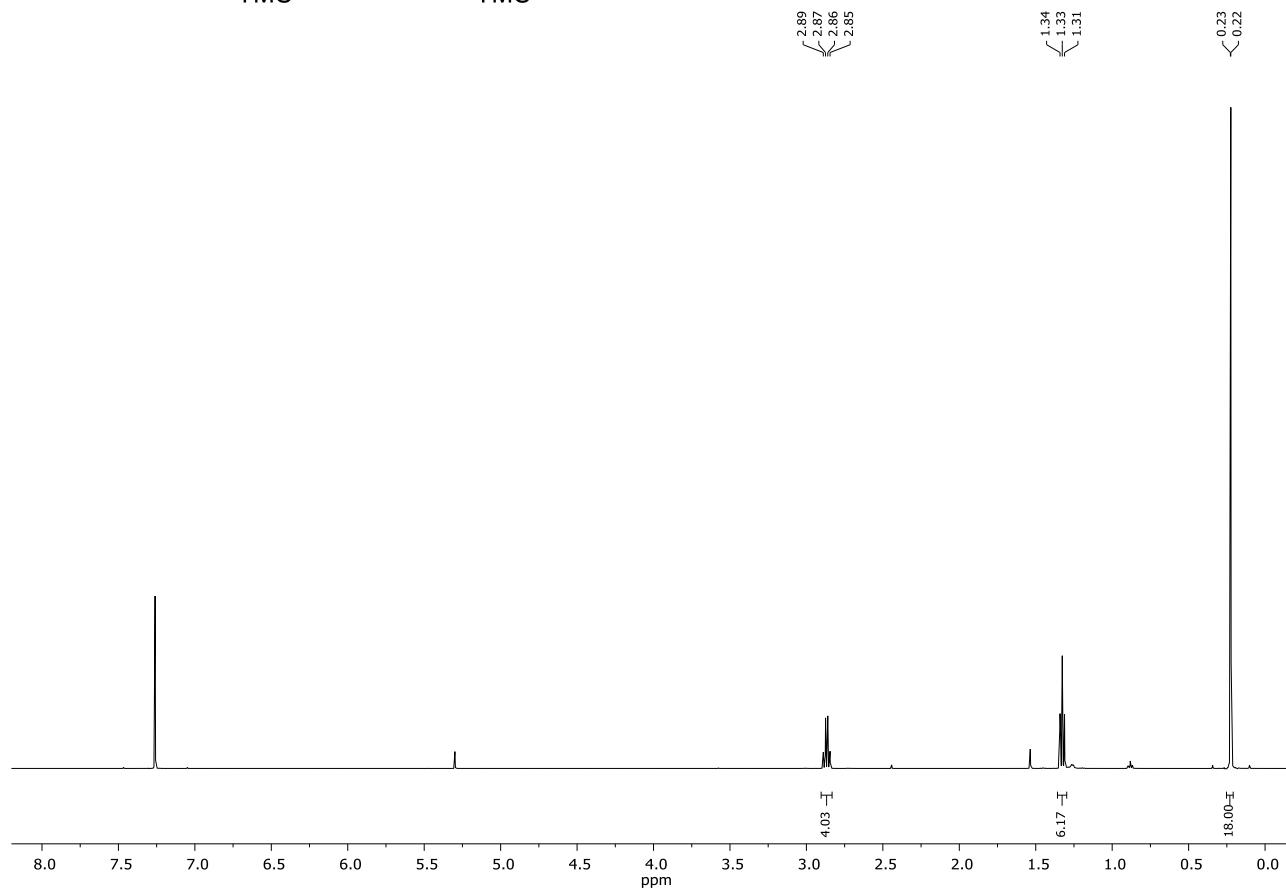

Figure S3: <sup>1</sup>H NMR (500 MHz) of 6 in CDCl<sub>3</sub>.

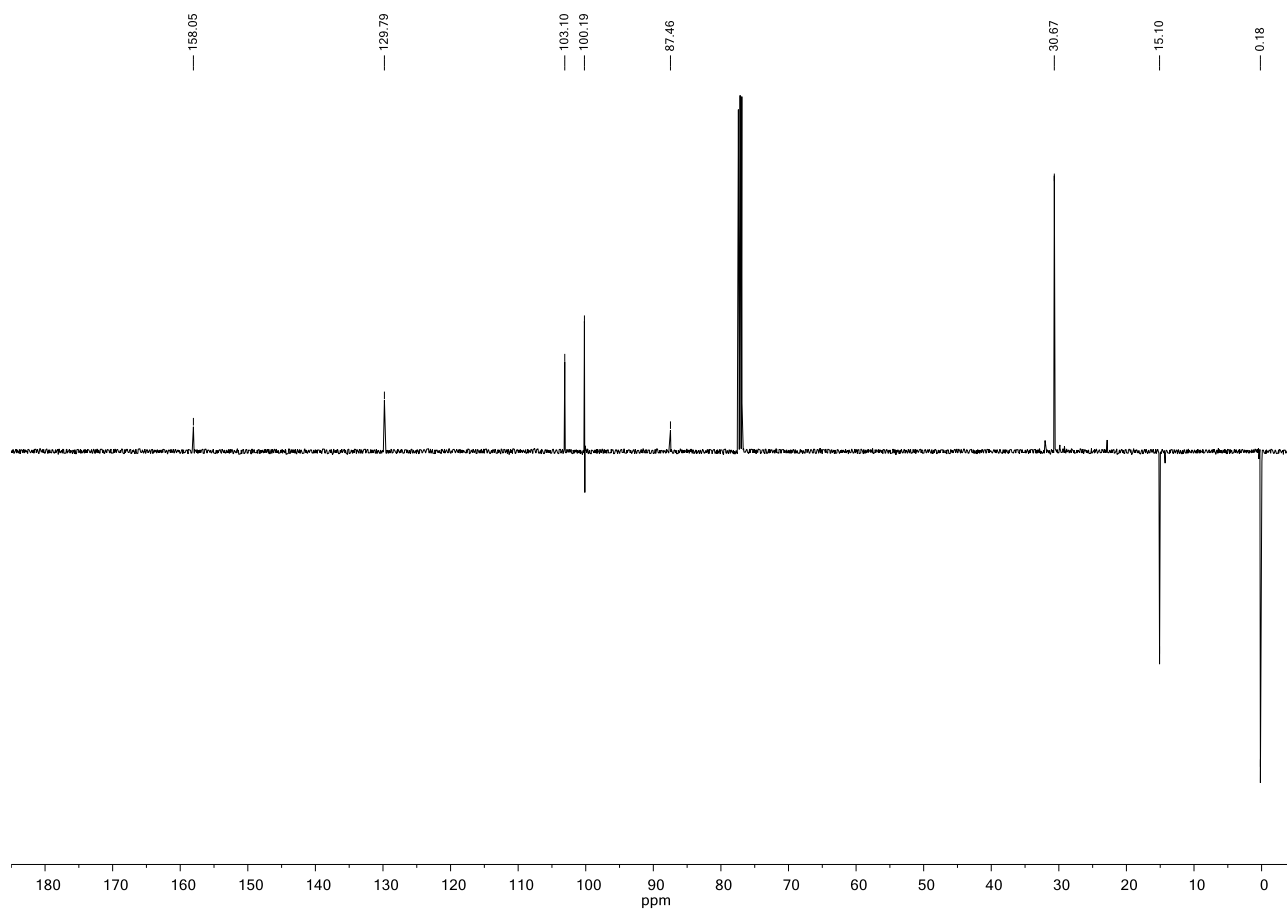

**Figure S4:**  $^{13}\text{C}$  APT NMR (126 MHz) of **6** in  $\text{CDCl}_3$ .

### Compound 9

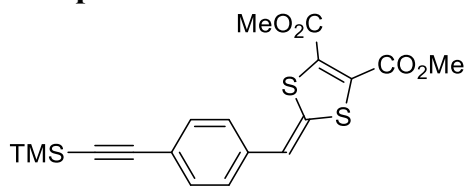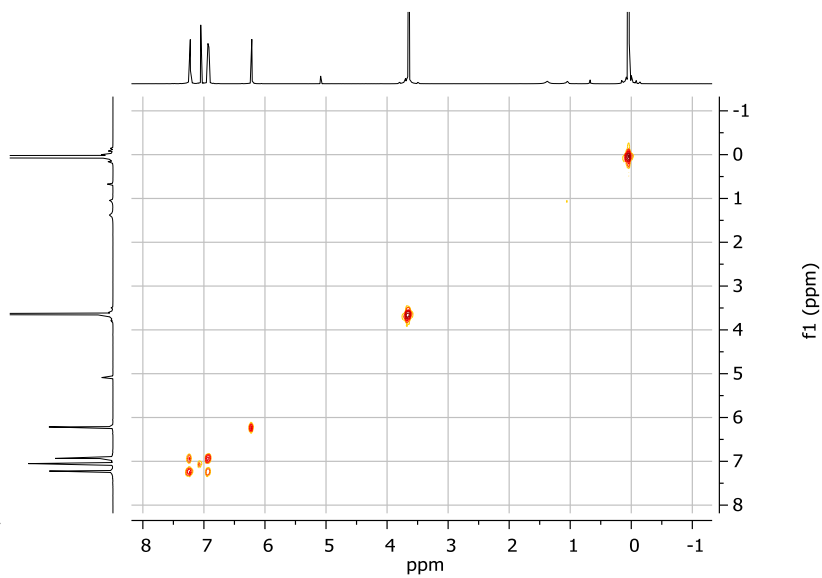

Figure S5: COSY NMR (500 MHz) of 9 in CDCl<sub>3</sub>.

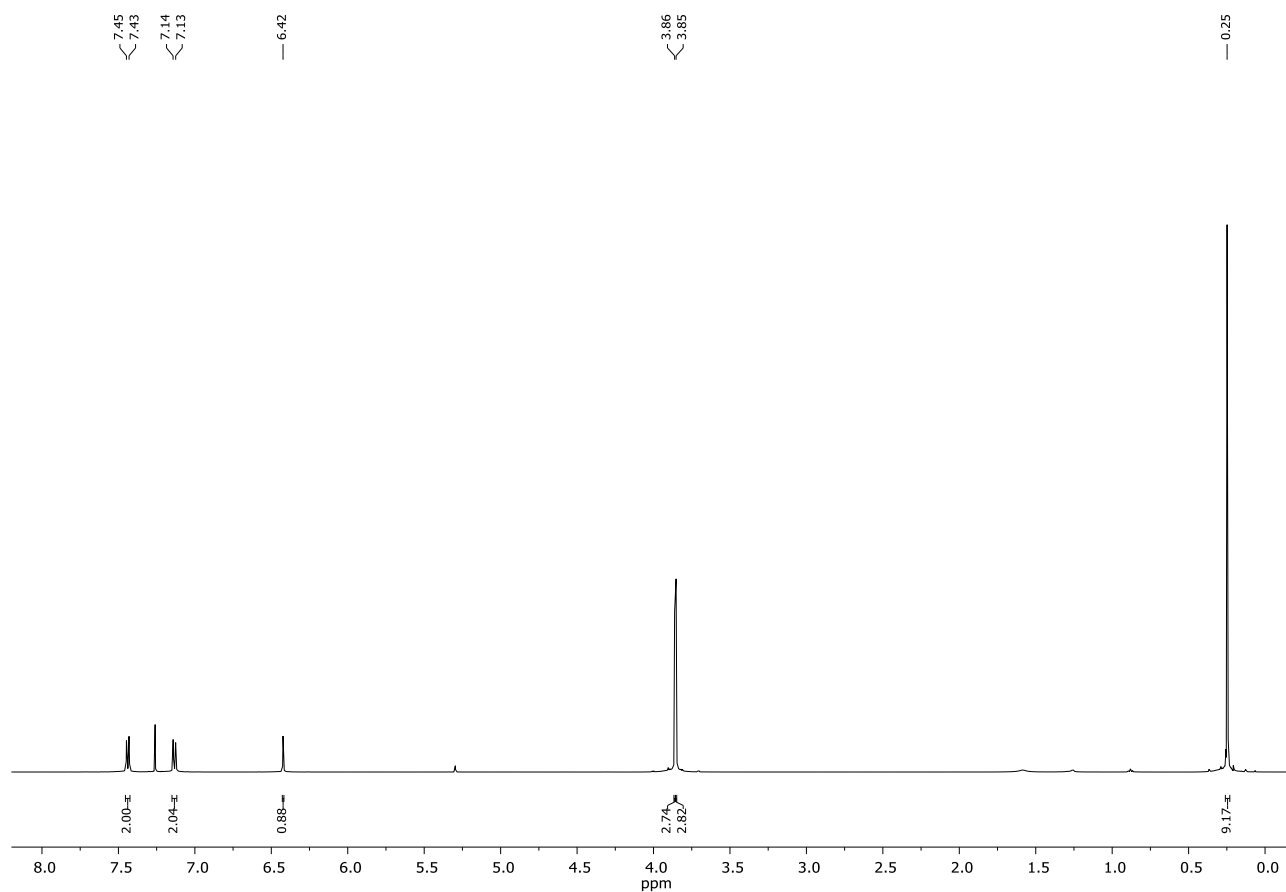

Figure S6: <sup>1</sup>H NMR (500 MHz) of 9 in CDCl<sub>3</sub>.

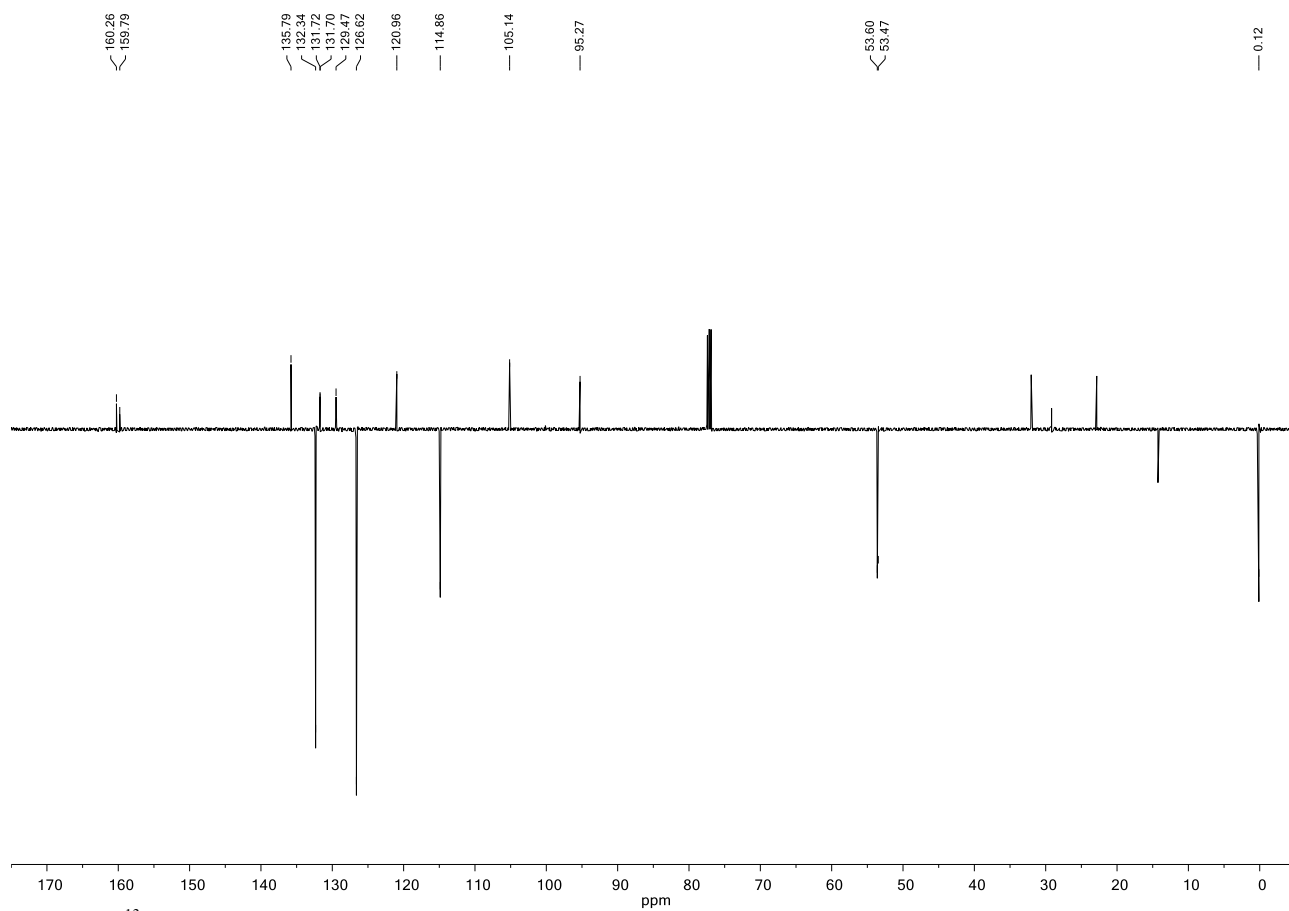

**Figure S7:**  $^{13}\text{C}$  APT NMR (126 MHz) of **9** in  $\text{CDCl}_3$ .





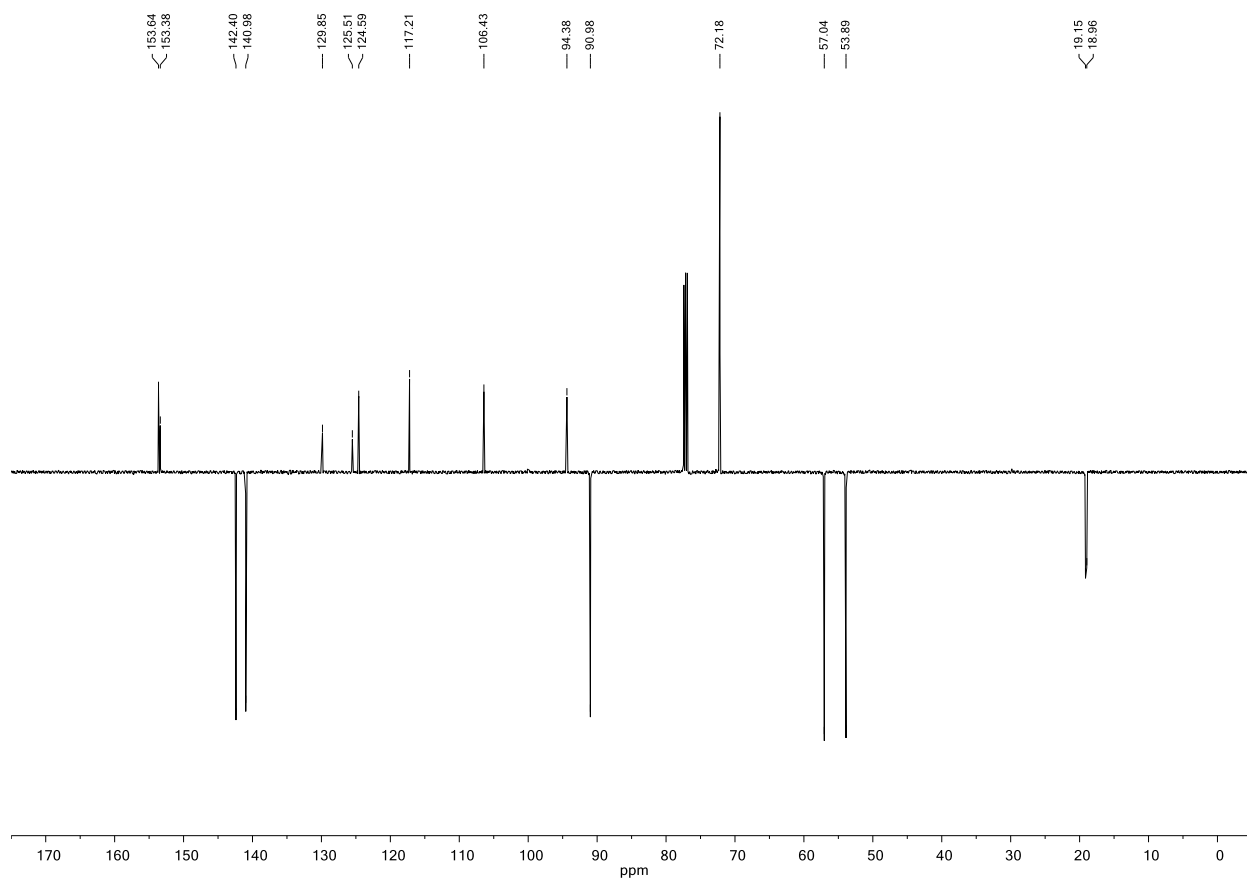

**Figure S10:**  $^{13}\text{C}$  APT NMR (126 MHz) of **10** in  $\text{CDCl}_3$ .

# Compound 11

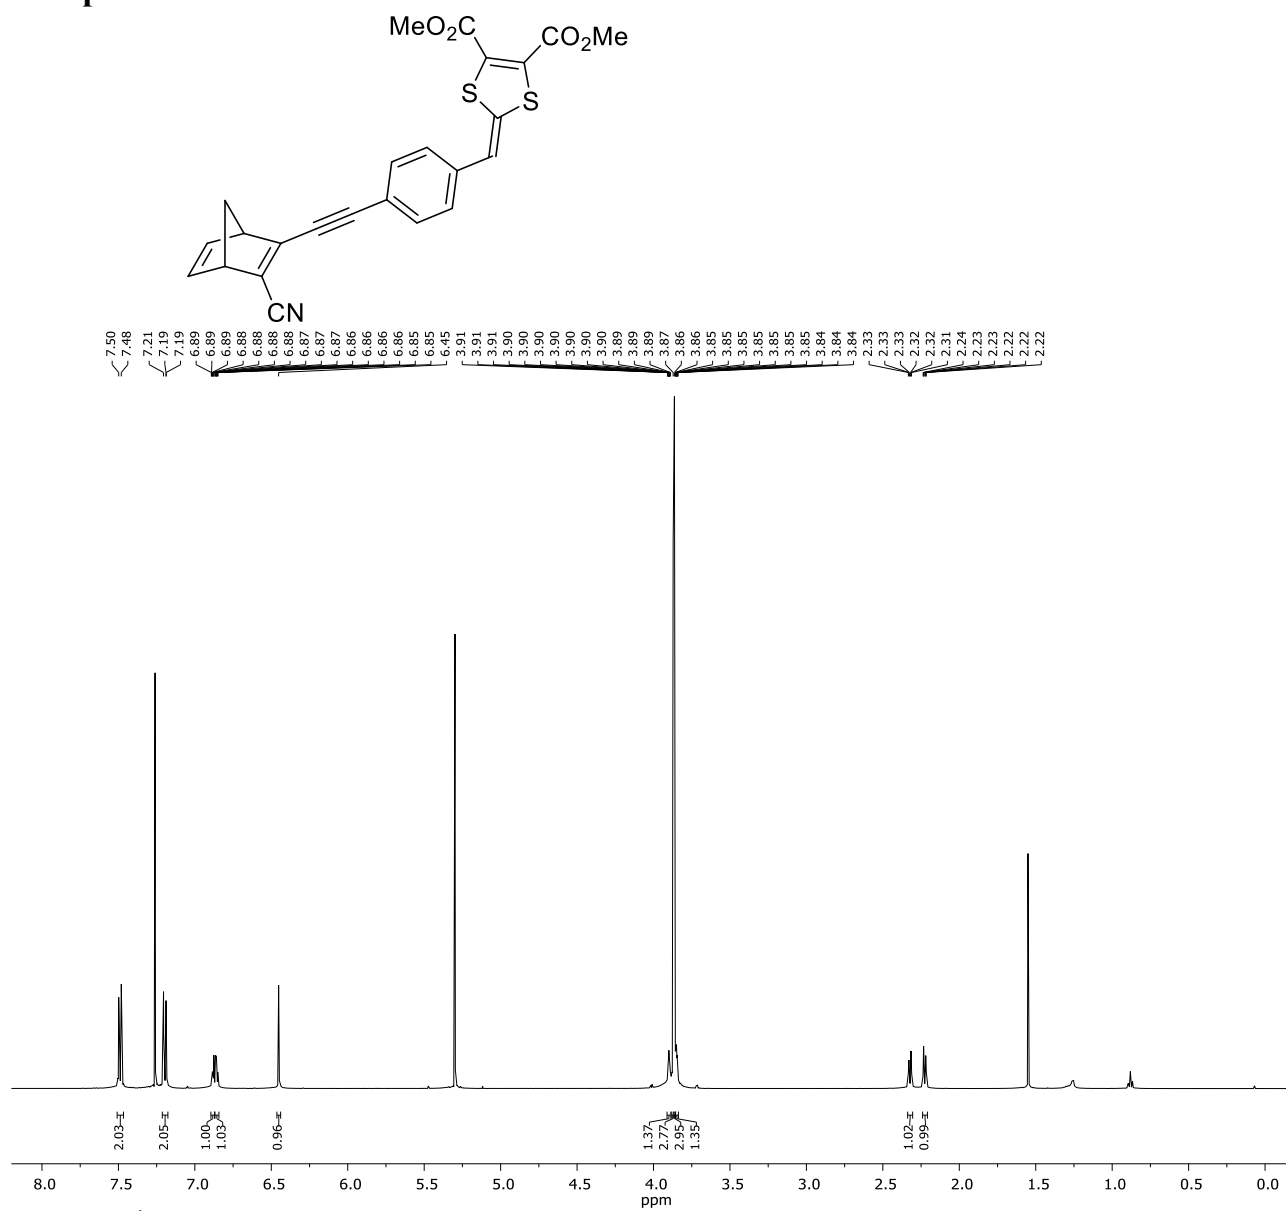

Figure S11: <sup>1</sup>H NMR (500 MHz) of 11 in CDCl<sub>3</sub>.

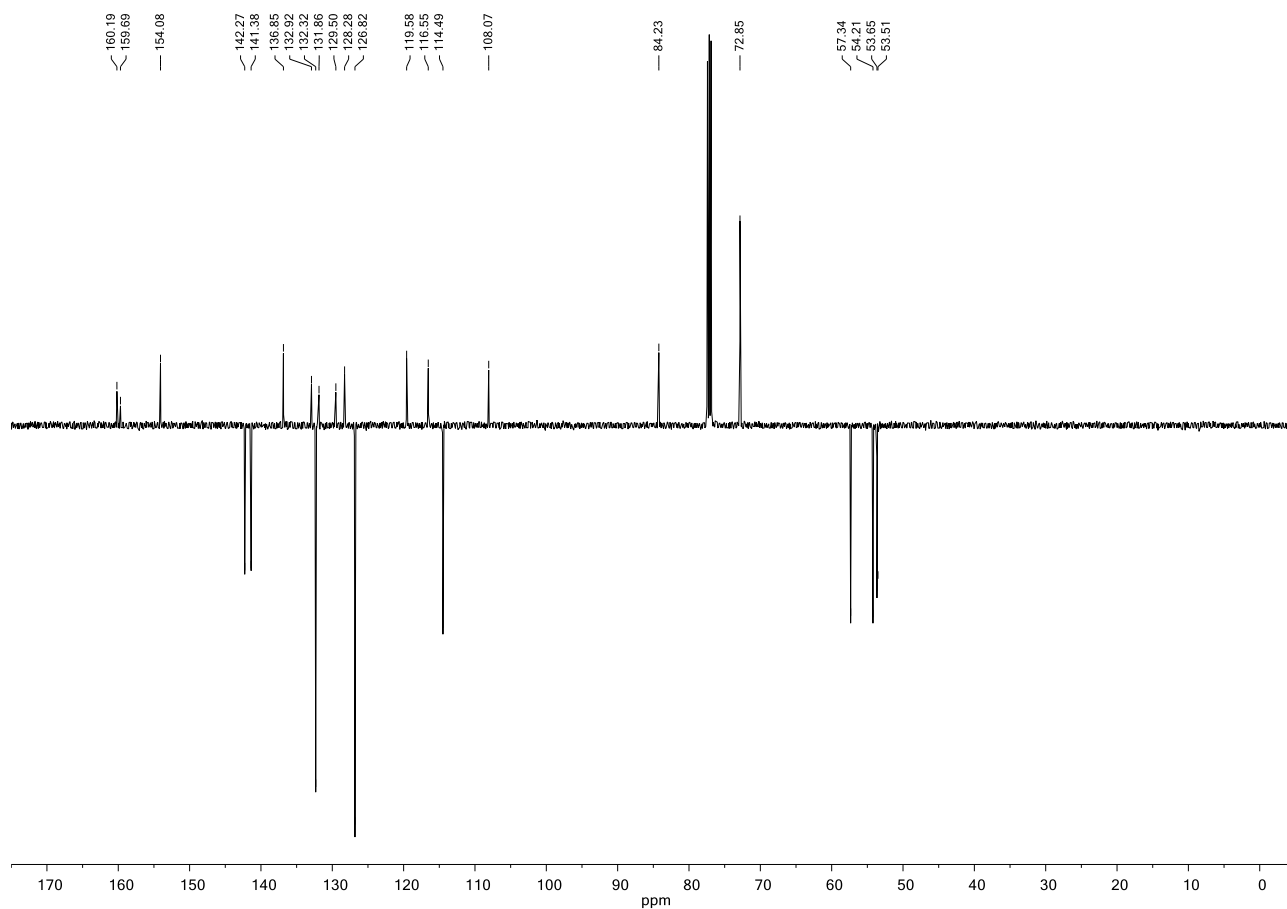

**Figure S12:**  $^{13}\text{C}$  APT NMR (126 MHz) of **11** in  $\text{CDCl}_3$ .



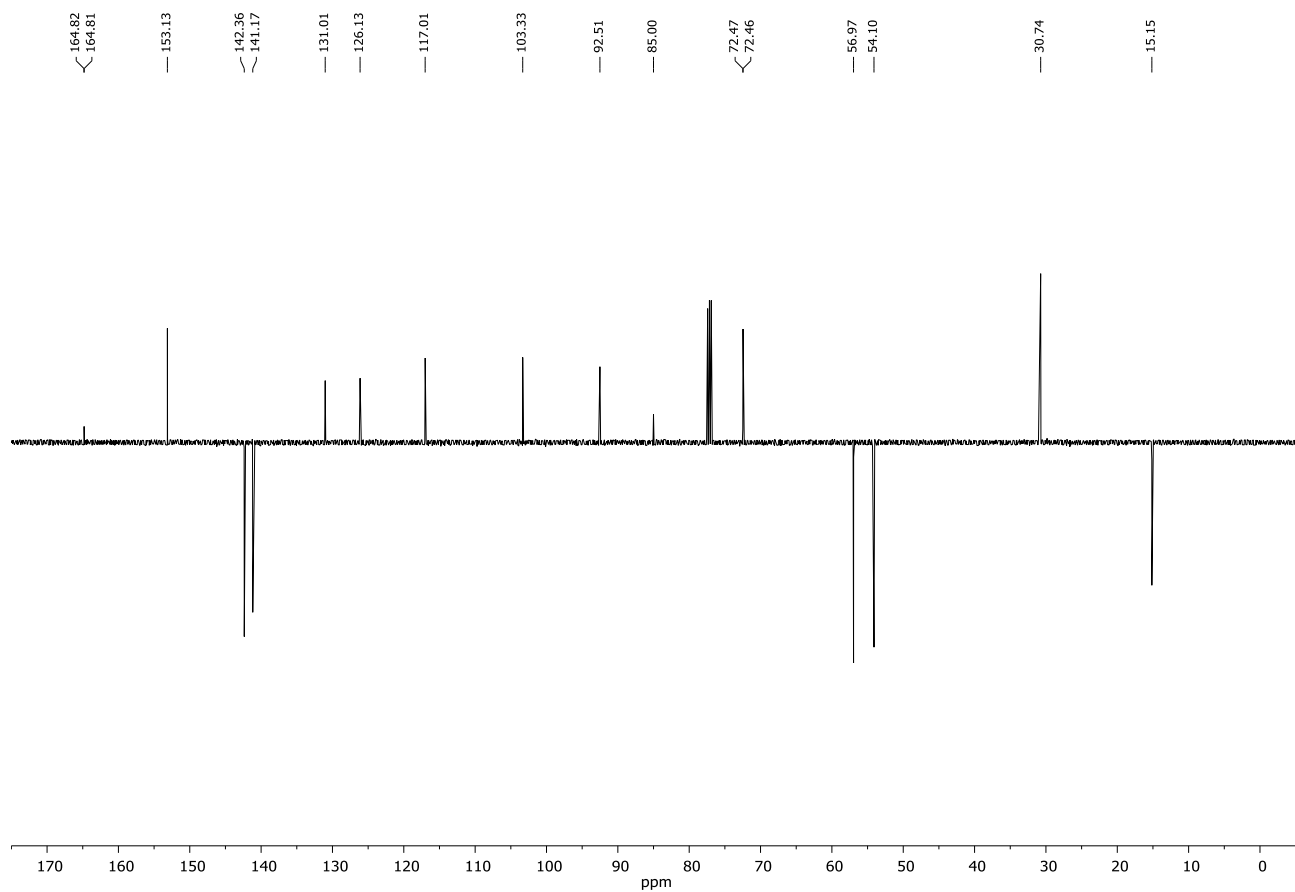

Figure S15:  $^{13}\text{C}$  APT NMR (126 MHz) of **12** in  $\text{CDCl}_3$ .

# Compound 13

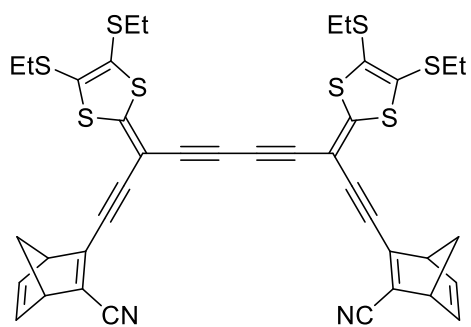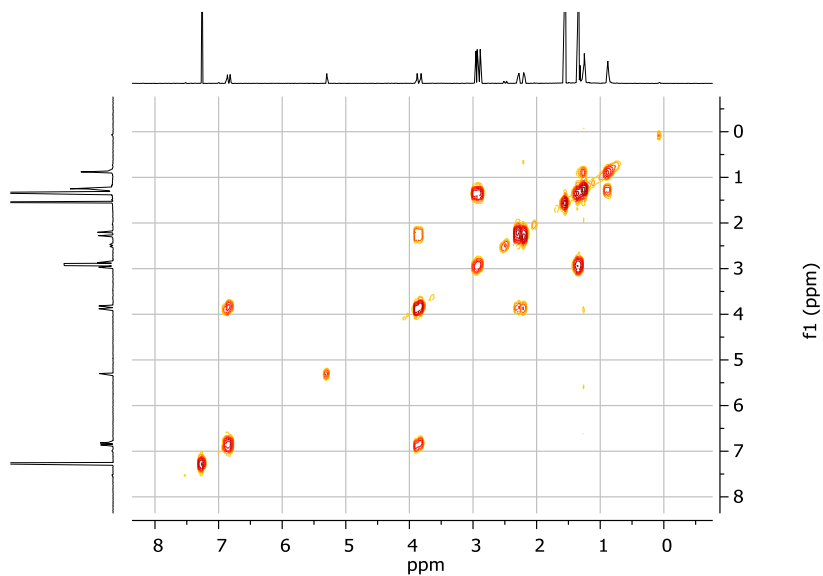

Figure S16: COSY NMR (500 MHz) of **13** in  $\text{CDCl}_3$ .

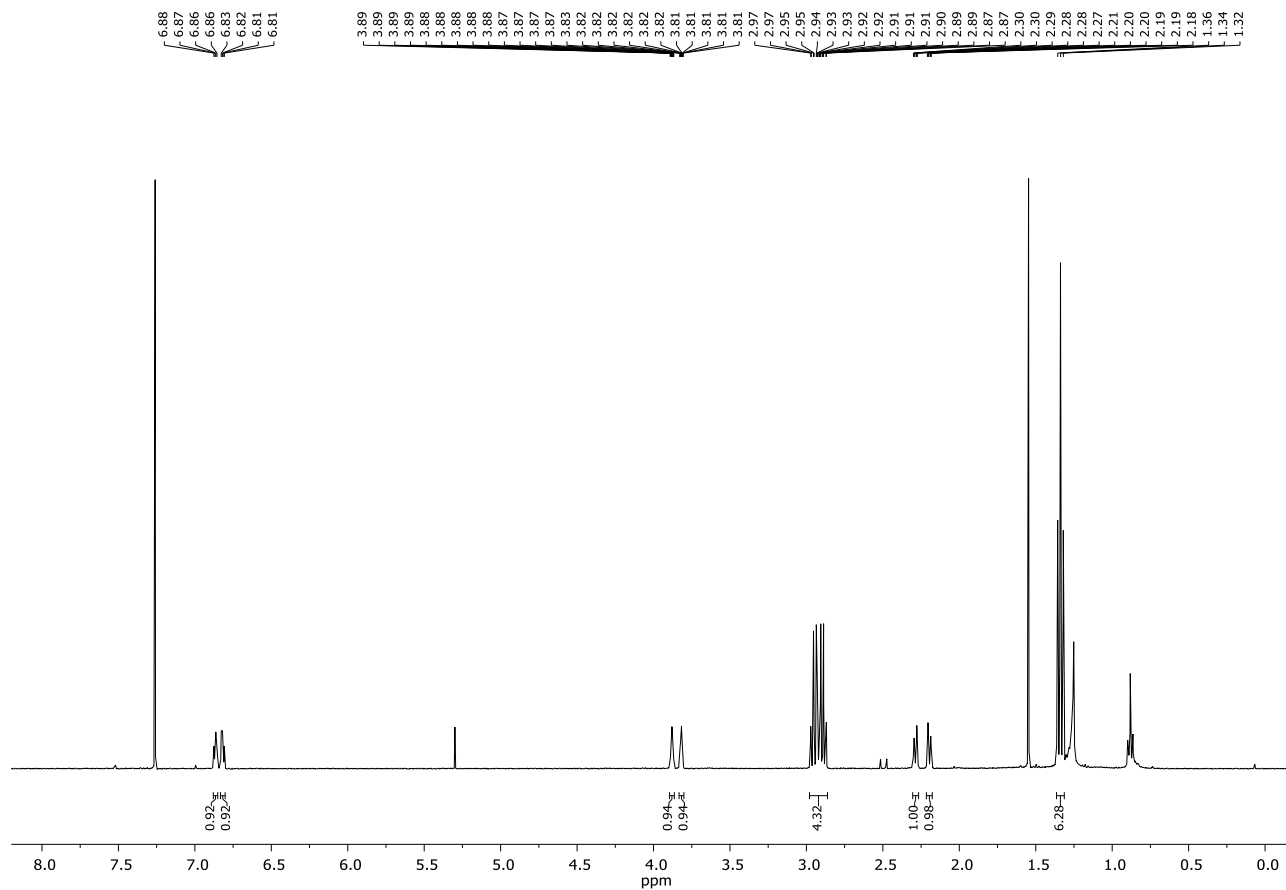

Figure S17:  $^1\text{H}$  NMR (400 MHz) of **13** in  $\text{CDCl}_3$ .

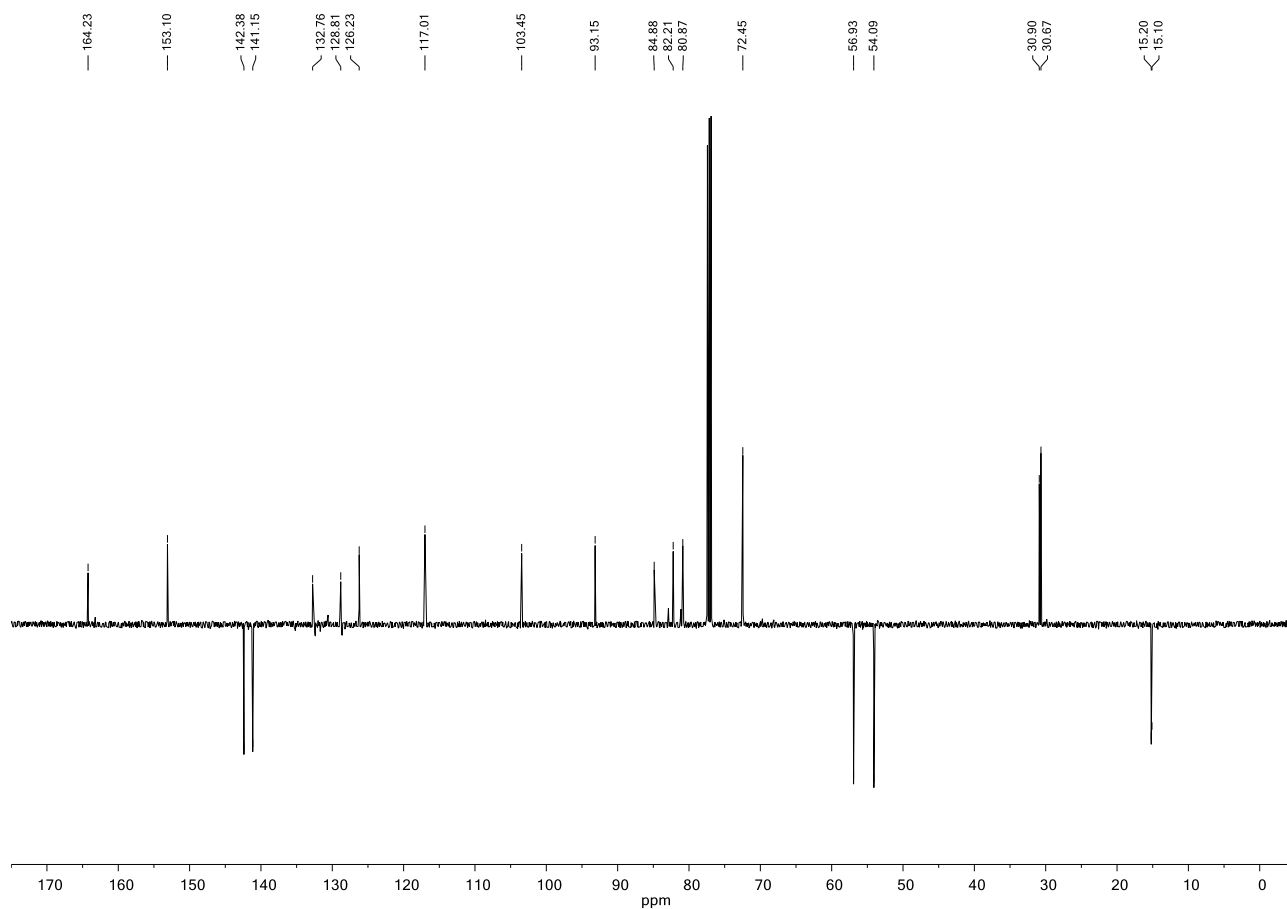

**Figure S18:**  $^{13}\text{C}$  APT NMR (126 MHz) of **13** in  $\text{CDCl}_3$ .

## UV-absorption and switching studies

### Compound 11

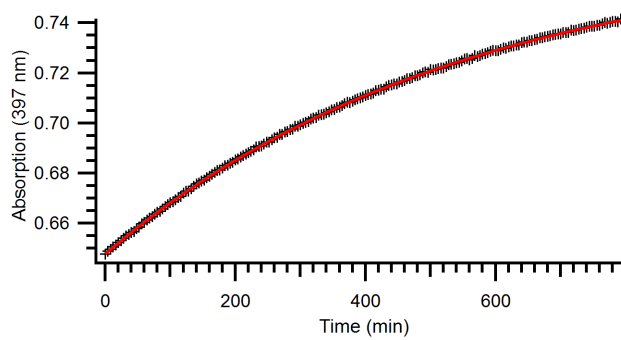

**Figure S19:** Exponential growth of **11** at 25 °C, after irradiation at 397 nm for 8 h.



# $^1\text{H}$ NMR switching studies

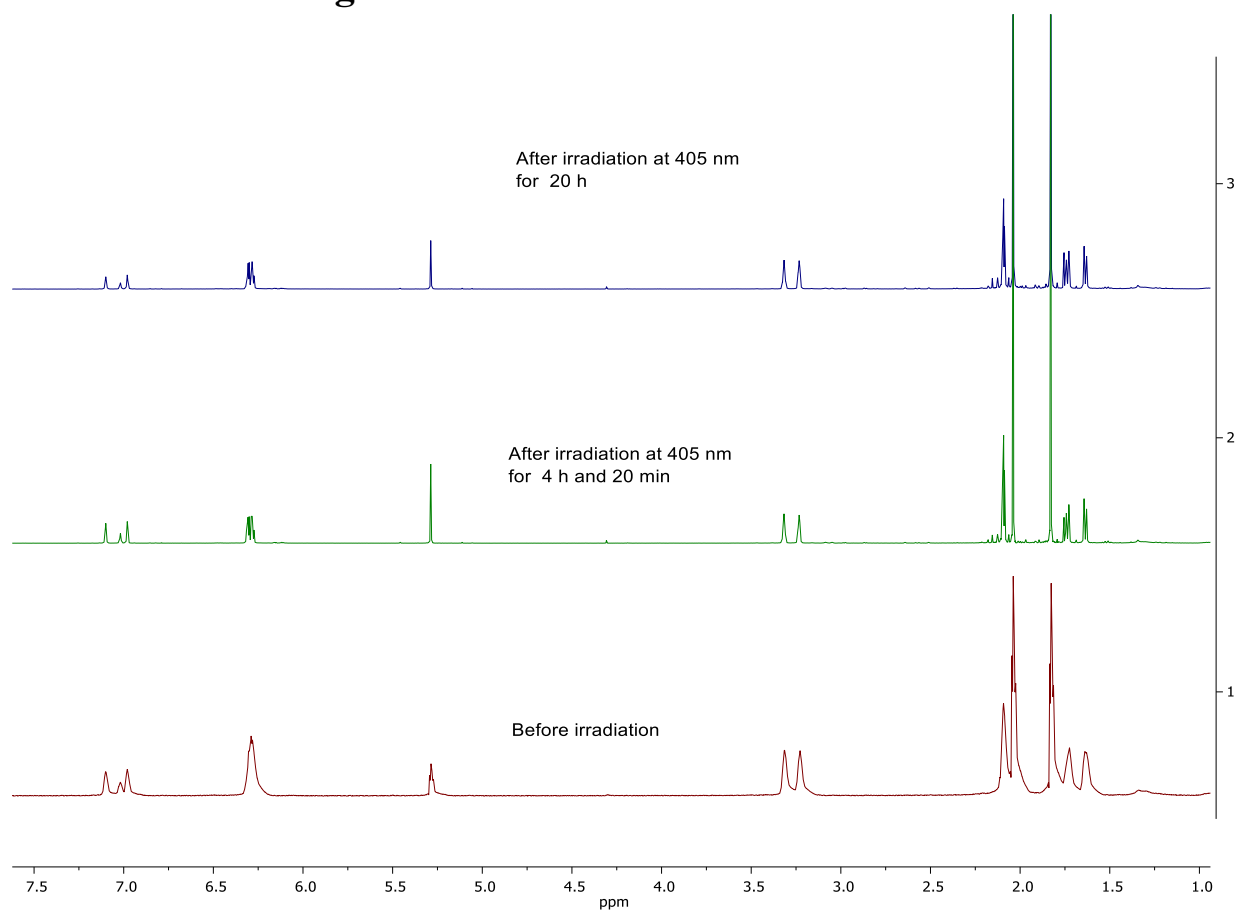

**Figure S20:**  $^1\text{H}$  NMR (400 MHz) spectra of compound **10** after irradiation with a 405 nm diode.

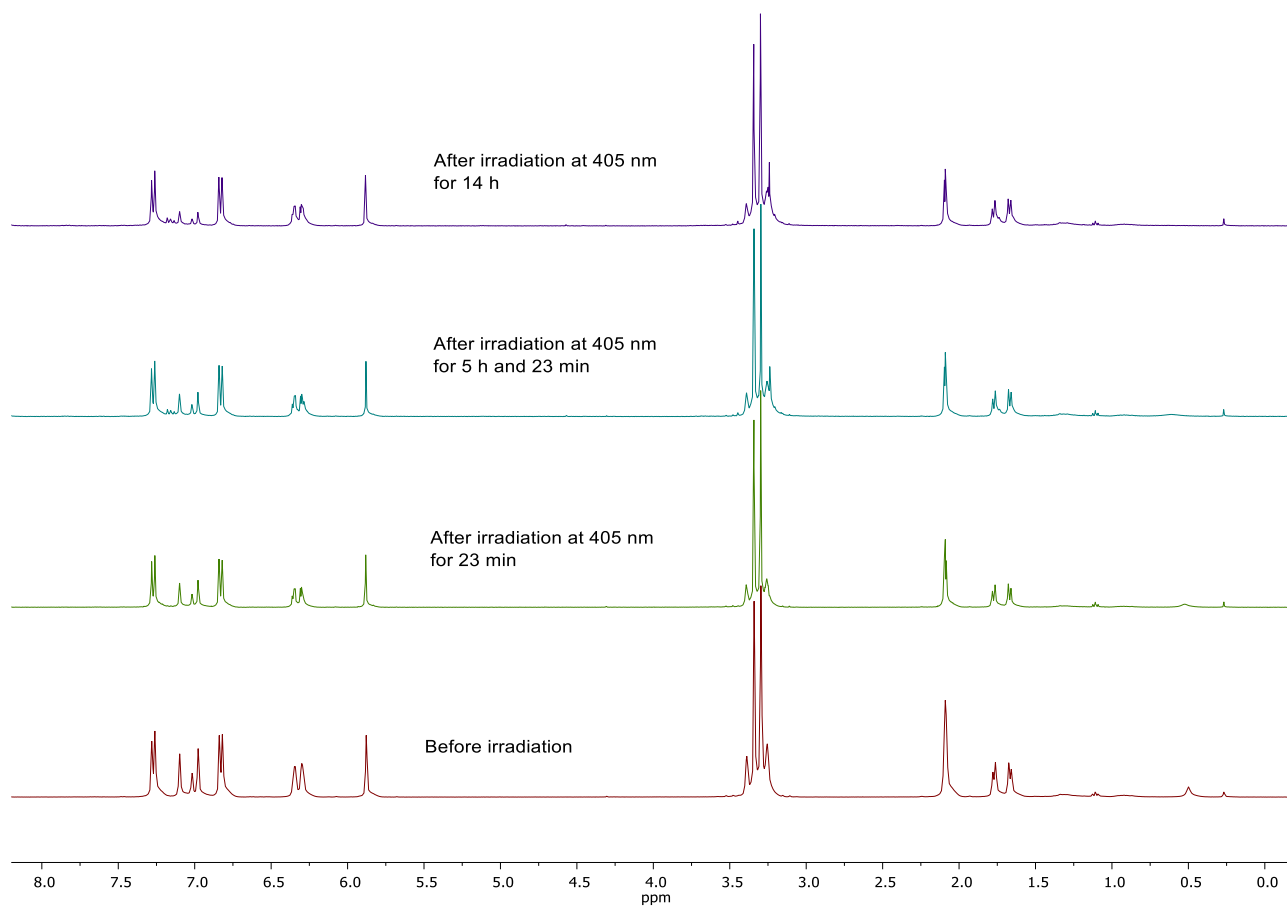

**Figure S21:**  $^1\text{H}$  NMR (400 MHz) spectra of compound **11** after irradiation with a 405 nm diode.

## Calculations

Table S1: Calculated absorption energies using either B3LYP or CAM-B3LYP.

| Compound  | Type | $\Delta H$ to Q<br>(eV, B3LYP) | $\lambda_{\max}$ (nm) |           |
|-----------|------|--------------------------------|-----------------------|-----------|
|           |      |                                | B3LYP                 | CAM-B3LYP |
| <b>11</b> | N    | -1.30                          | 413                   | 374       |
| <b>11</b> | Q    | 0.00                           | 371                   | 332       |
| <b>12</b> | N    | -1.25                          | 467                   | 375       |
| <b>12</b> | Q    | 0.00                           | 460                   | 363       |
| <b>13</b> | NN   | -2.39                          | 470                   | 381       |
| <b>13</b> | NQ   | -1.25                          | 429                   | 382       |
| <b>13</b> | QQ   | 0.00                           | 367                   | 330       |
| <b>14</b> | NN   | -2.60                          | 539                   | 419       |
| <b>14</b> | NQ   | -1.30                          | 513                   | 414       |
| <b>14</b> | QQ   | 0.00                           | 460                   | 398       |
